# Supplementary material for: Early sex-dependent differences in metabolic profiles of overweight and adiposity in young children: a cross-sectional analysis
Source: Springer Nature journal article supplement (doi:10.1186/s12916-023-02886-8), 2023-05-09

Figure S1. Flow chart for overweight/adiposity case selection in CHILD at age 5 years

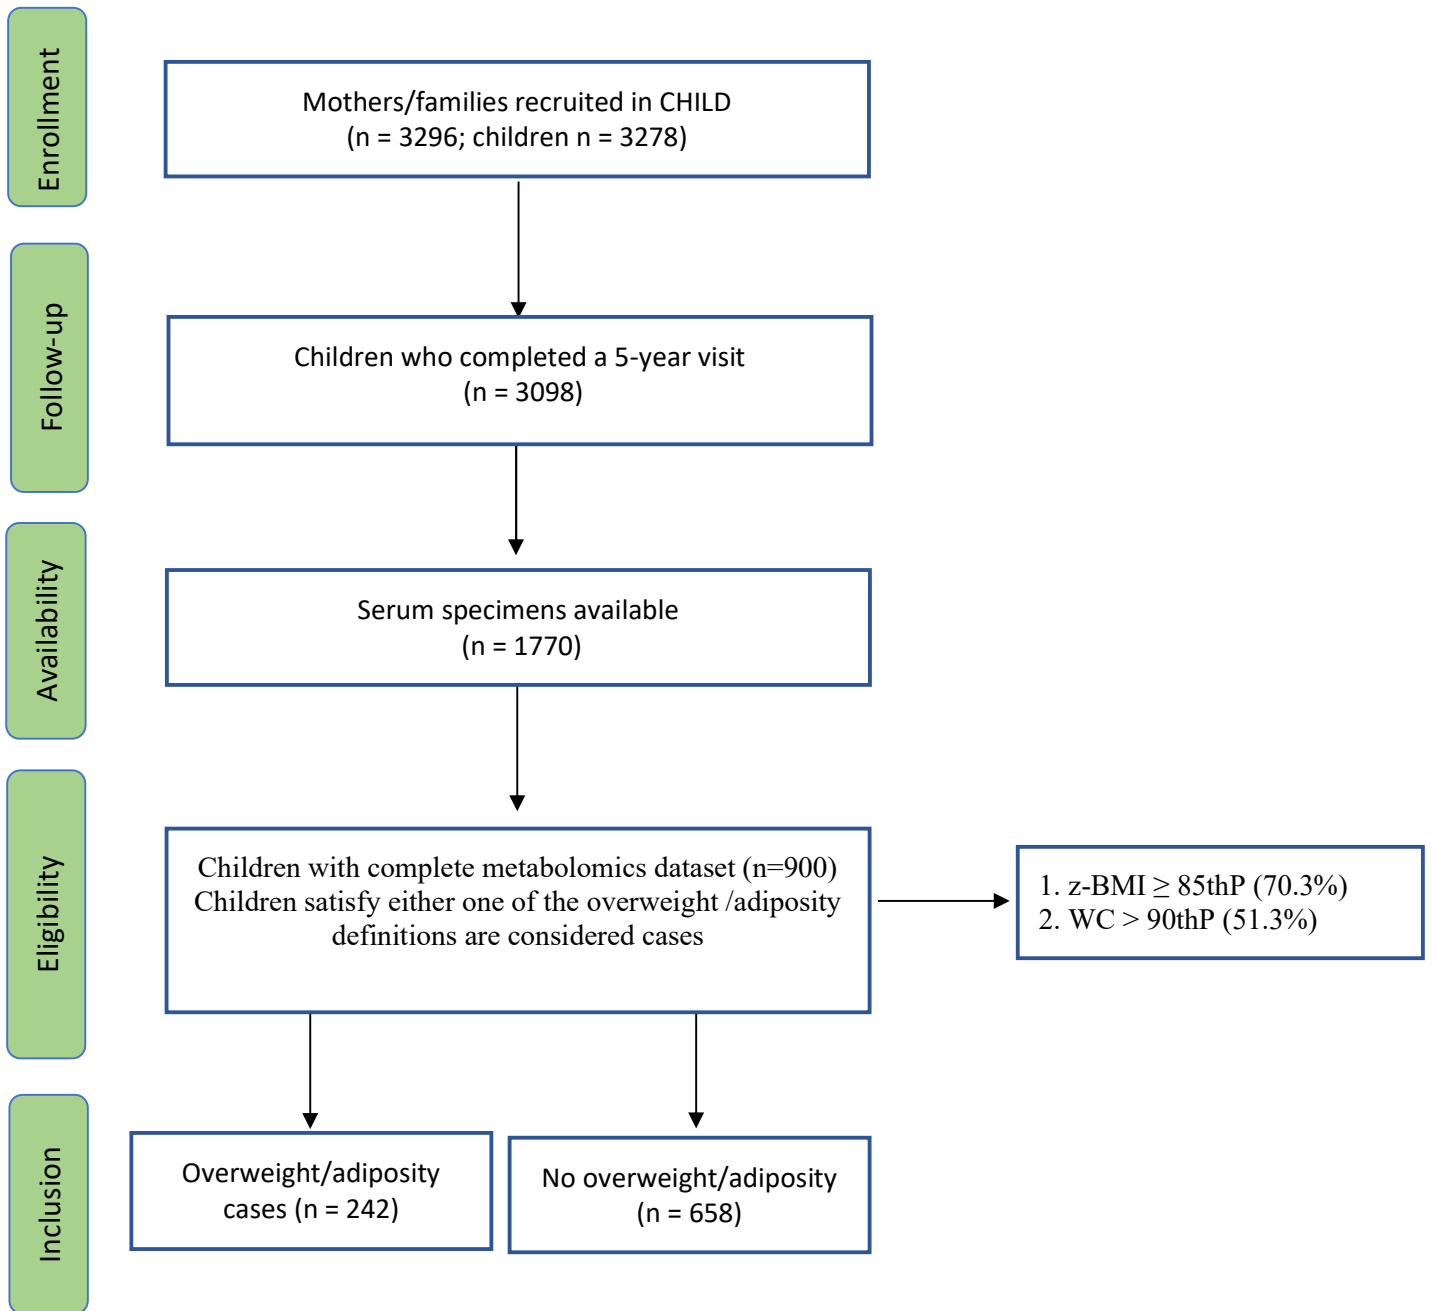

Supplement: MOESM1 [file 25337000]
